# Supplementary material for: An Improved Approach of Classical Upper Bound Theory for Stability Analysis of Layered Slopes
Source: Hindawi journal article supplement (doi:10.1155/2023/4286038), 2023-09-25
Supplement: f1 [file 4286038.f1.docx]

**Code availability section**

Name of the code/library :

Slope stability analysis code 1 (example1,Fig.3)

Slope stability analysis code 2 (Example2,Fig.4)

Slope stability analysis code 3 (Example3, Fig.8)

Contact: email:tianzerun1989@163.com and [phone number](javascript:;): 18109448392

- Hardware requirements: Computer memory is not less than 4GB(RAM≥4GB)

Program language: Matlab

Software required: Matlab ( R2018a)

Program size: 11.7 KB /8.95 KB /11.8KB

The source codes are available for downloading at the link: https://github.com/ZeRunTian/The-Code-of-Layered-Slope
